# Supplementary material for: The leucine zipper domain of the transcriptional repressor Opi1 underlies a signal transduction mechanism regulating lipid synthesis
Source: PubMed Central journal article supplement (PMC10709064; doi:10.1016/j.jbc.2023.105417), 2023-10-31
Supplement: mmc1.pdf [file mmc1.pdf]

**The leucine zipper domain of the transcriptional repressor Opi1 underlies a signal transduction mechanism regulating lipid synthesis**

J. Pedro Fernández-Murray, Mahtab Tavasoli, Jason Williams, and Christopher R. McMaster

Supplemental information included

Supporting Figures S1-S10

Supporting Tables S1-S6



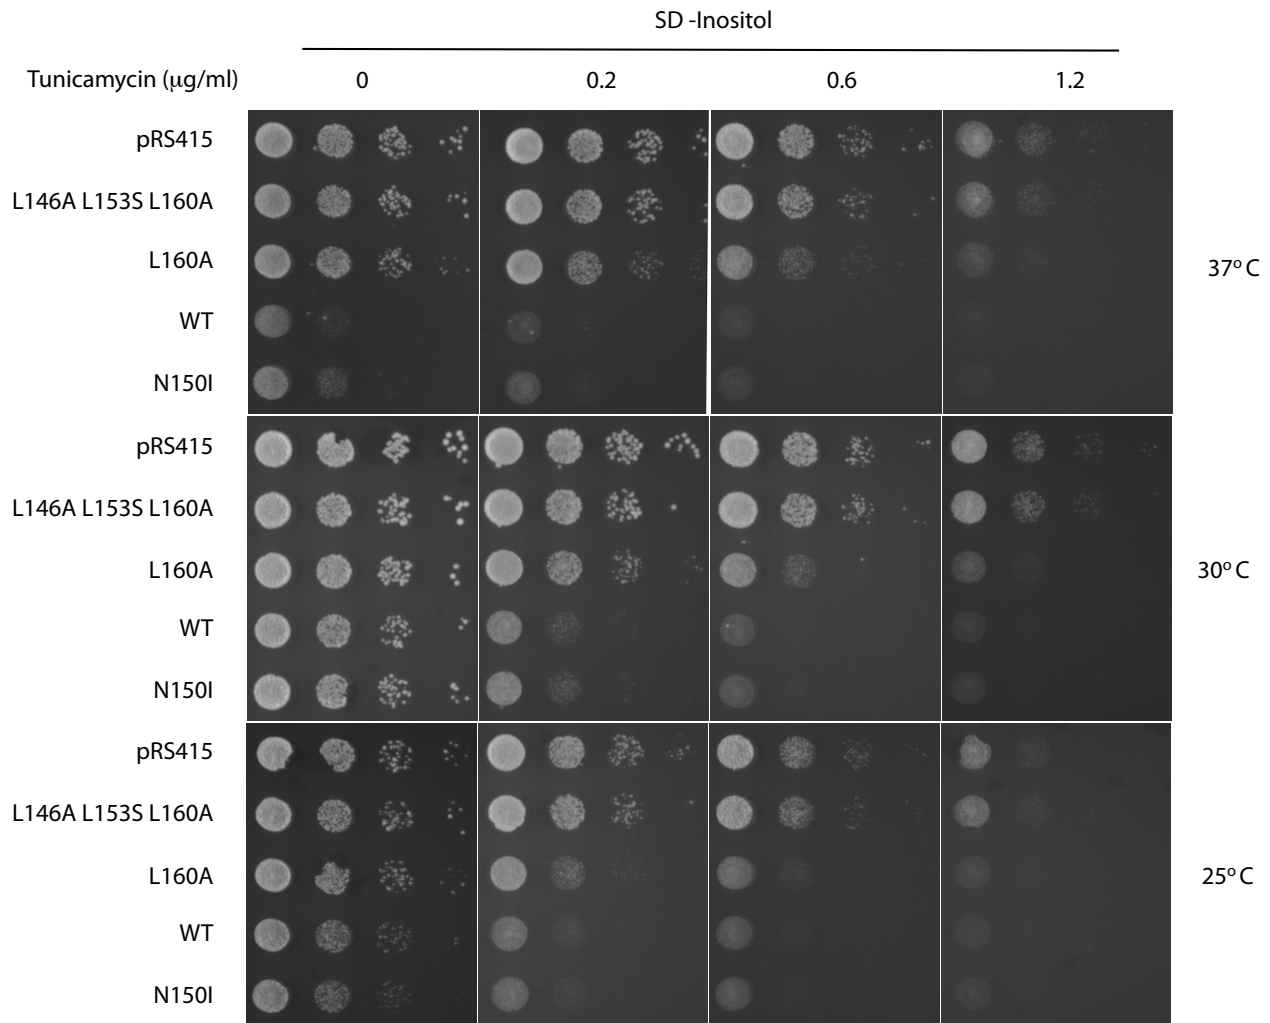

**Figure S2. Non-ionic replacement of N150 residue by isoleucine does not elicit an *ino* phenotype.** The indicated allelic variants encoded in a pRS415 vector were expressed in *opi1Δ* cells. Transformed cells were grown overnight in selective defined media containing 0.2 mM inositol. Cells were thoroughly washed and spotted as 10-fold serial dilutions at an initial cell density of  $\text{OD}_{660 \text{ nm}}$  of 0.4 onto synthetic selective solid media without inositol and the indicated concentration of tunicamycin. Plates were incubated at 25°C, 30°C and 37°C for 2 days. For assessing the possible effect of N150I mutation attenuating Opi1 repression, LOF variants Opi1<sup>L160A</sup> and Opi1<sup>L146A L153S L160A</sup> were included.

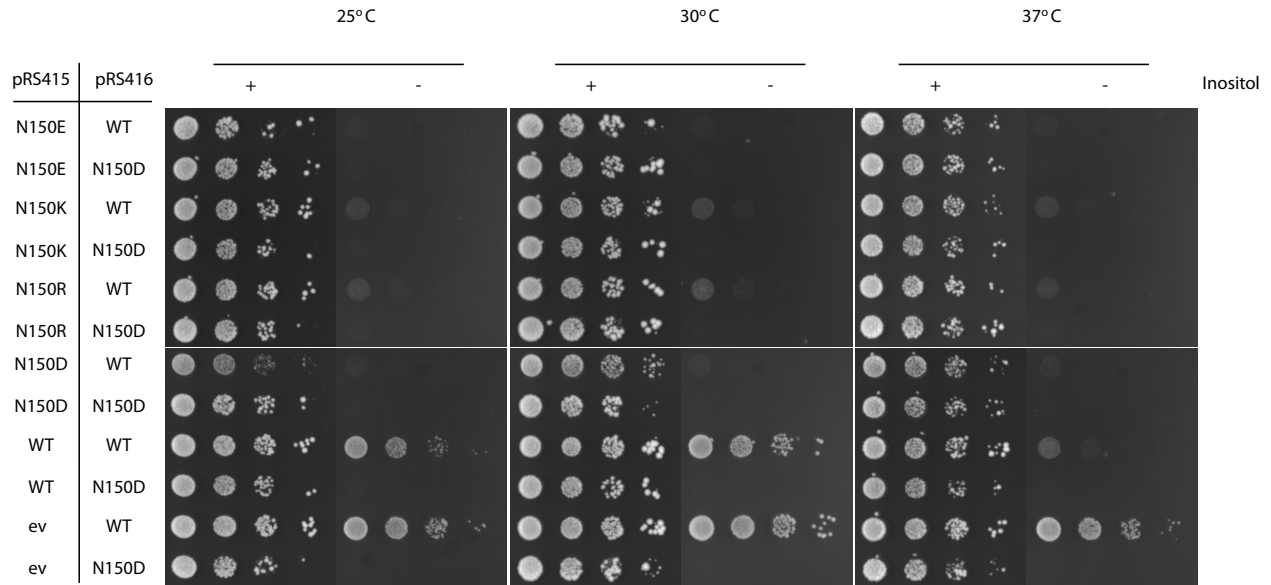

**Figure S3. Co-expression of Opi1 variants of opposite charge at residue 150 do not prevent repression.** *opi1*Δ cells transformed with a pRS416 vector expressing the WT or the N150D variant of Opi1 and a pRS415 vector encoding or not the indicated *OPI1* allelic variants, were grown in synthetic selective media containing 0.2 mM inositol for 16 hours at 30° C. Cells were thoroughly washed and spotted as a 10-fold serial dilution at an initial cell density of OD<sub>660 nm</sub> of 0.4 onto synthetic selective solid media containing or not 0.2 mM inositol. Plates were incubated at the indicated temperatures for 3 days. ev, empty vector

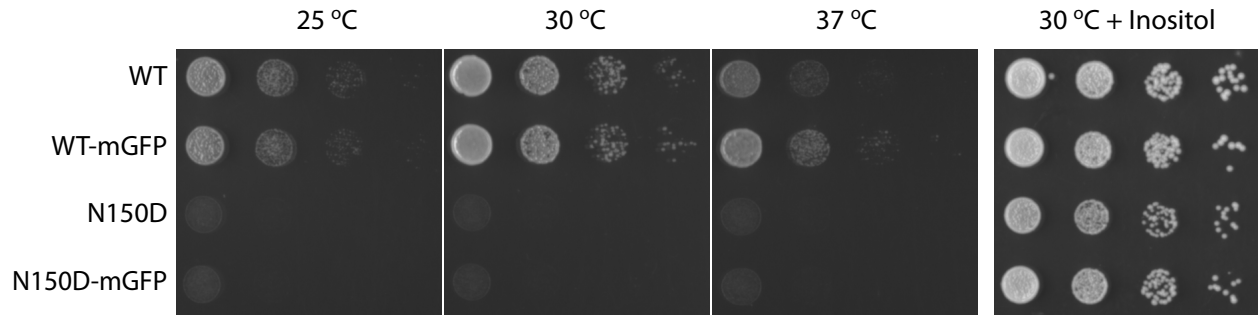

**Figure S4. C-terminal mGFP tagging does not attenuate Opi1 repression.** The indicated allelic variants encoded in a pRS415 vector were expressed in *opi1Δ* cells. Transformed cells were grown overnight in selective define media containing 0.2 mM inositol. Cells were thoroughly washed and spotted as a 10-fold serial dilution at an initial cell density of OD<sub>660 nm</sub> of 0.4 onto synthetic selective solid media containing or not 0.2 mM inositol. Plates were incubated at 30° C for 2 days.

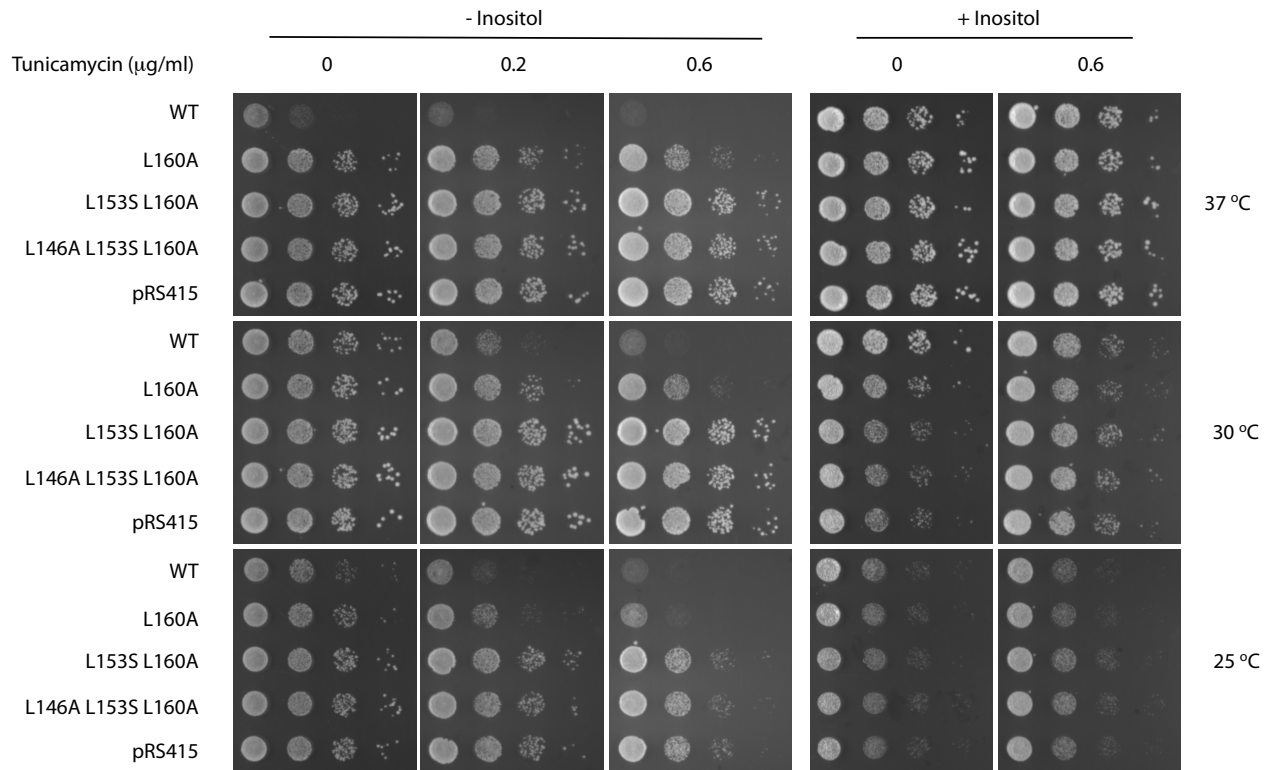

**Figure S5. Successive mutations of *d* leucine residues prevent *Opi1* repression.** The indicated allelic variants encoded in a pRS415 vector were expressed in *opi1* $\Delta$  cells. Transformed cells were grown overnight in selective define media containing 0.2 mM inositol. Cells were thoroughly washed and spotted as a 10-fold serial dilution at an initial cell density of  $\text{OD}_{660 \text{ nm}}$  of 0.4 onto synthetic selective solid media containing or not 0.2 mM inositol and the indicated concentration of tunicamycin. Plates were incubated at 25° C, 30° C and 37° C for 2 days.

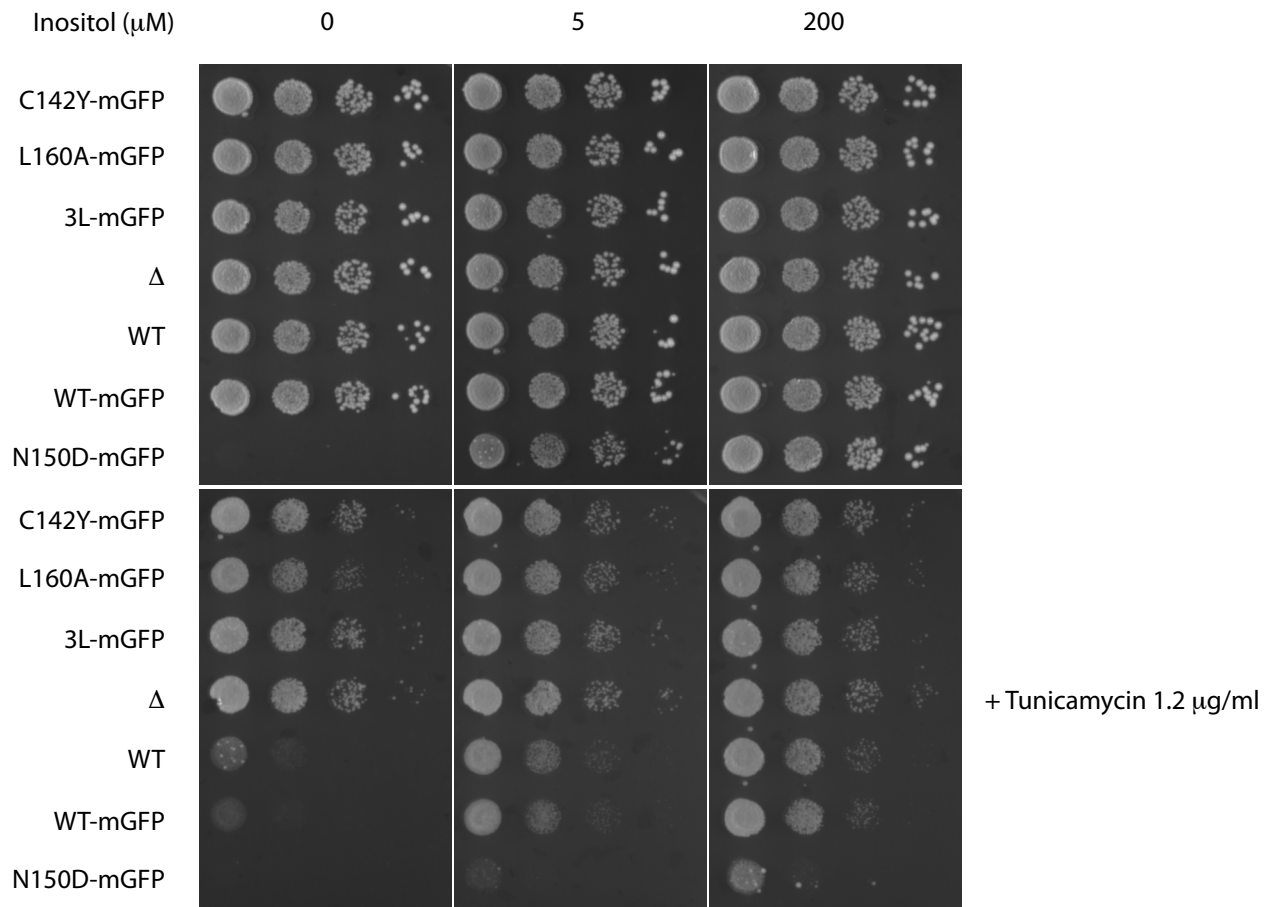

**Figure S6. Phenotypic spectrum of LZ mutations.** Yeast haploid cells expressing the indicated *OPI1* allelic variants from *OPI1* chromosomal locus were grown overnight in defined media containing 0.2 mM inositol. Cells were thoroughly washed and spotted as a 10-fold serial dilution at an initial cell density of  $\text{OD}_{660 \text{ nm}}$  of 0.4 onto synthetic solid media containing or not the indicated amount of inositol +/- tunicamycin. Plates were incubated at 30°C for 2 days.

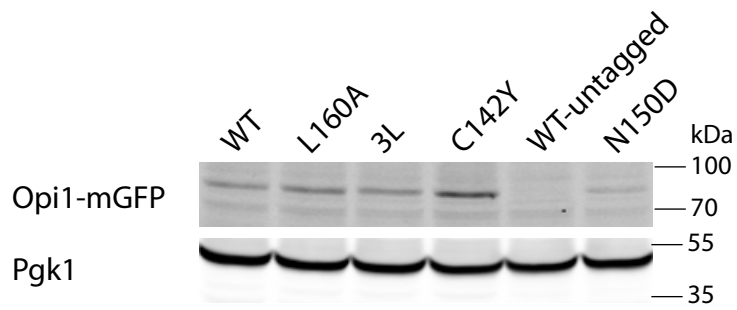

**Figure S7. Steady state levels of LZ Opi1-mGFP variants.** Haploids cells grown on synthetic define media containing 0.2 mM inositol were cultivated for 8 hours on synthetic define media containing 5  $\mu$ M inositol. Whole cell extracts were prepared and analyzed by SDS-PAGE. Abundance of Opi1-mGFP polypeptide was estimated by western blotting against GFP. Loading standardization was based on immunodetection of Pgk1.



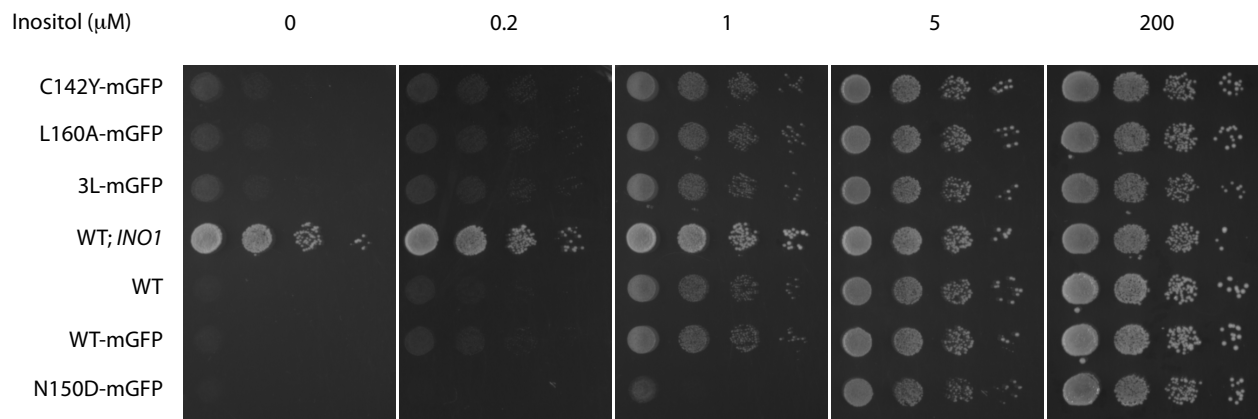

**Figure S8. Inositol dependent growth phenotype of *ino1* $\Delta$  strains.** Yeast *ino1* $\Delta$  cells expressing the indicated *OPI1* allelic variants from *OPI1* chromosomal locus were grown overnight in defined media containing 0.2 mM inositol. Cells were thoroughly washed and spotted as a 10-fold serial dilution at an initial cell density of  $\text{OD}_{660 \text{ nm}}$  of 0.4 onto synthetic selective solid media containing the indicated amount of inositol. Plates were incubated at 30°C for 2 days.

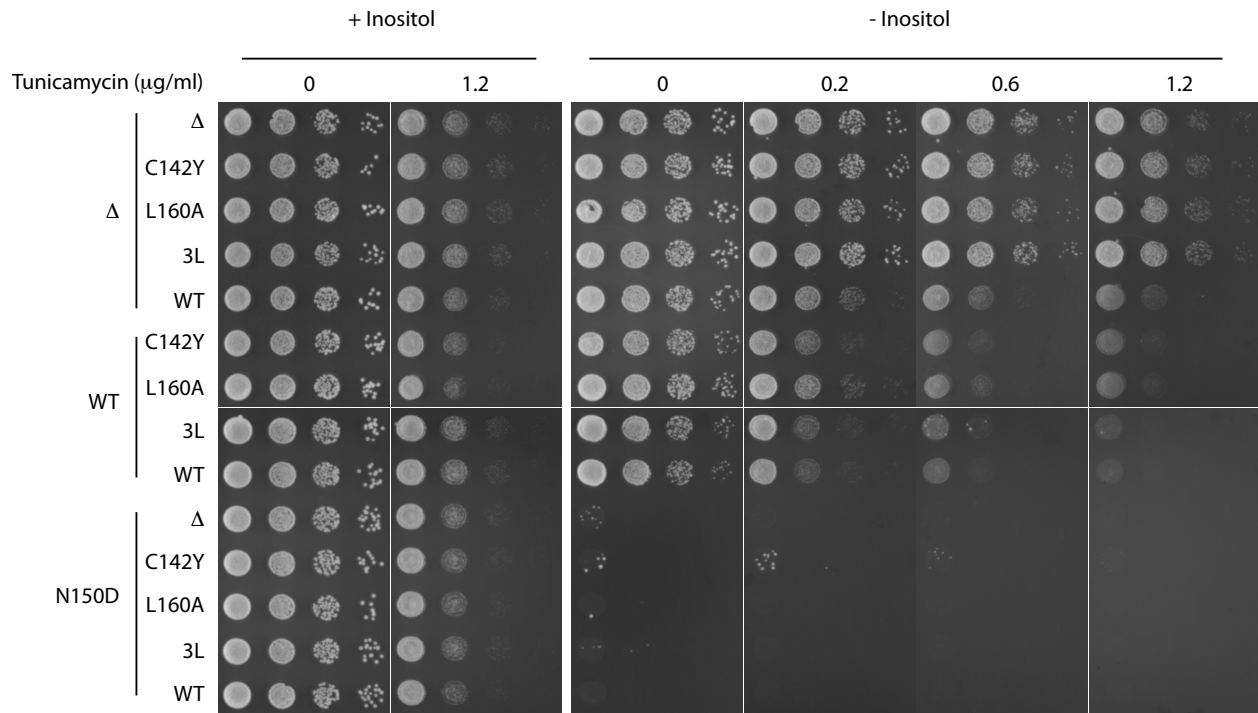

**Figure S9. Genetic analysis for *Opi1*<sup>N150D</sup> variant.** Diploid cells expressing the indicated LZ allelic variants C-terminally tagged with -mGFP from *OPI1* chromosomal loci were grown overnight in synthetic media containing 0.2 mM inositol at 30° C. Cells were thoroughly washed and spotted as a 10-fold serial dilution at an initial cell density of OD<sub>660 nm</sub> of 0.4 onto synthetic solid media containing or not 0.2 mM inositol and the indicated amounts of tunicamycin. Plates were incubated at 30° C for 2 days.

**A**

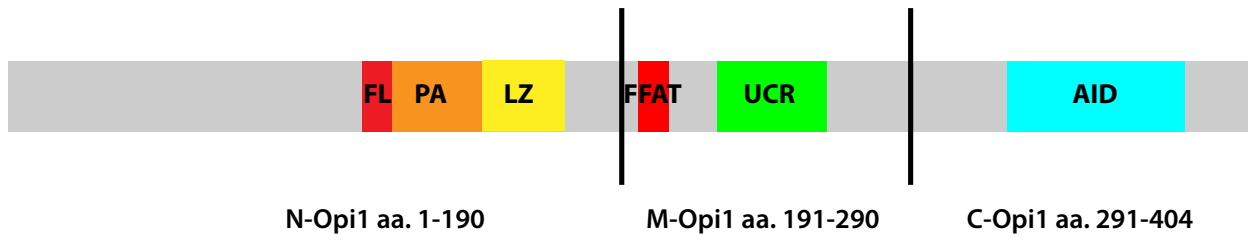

**B**

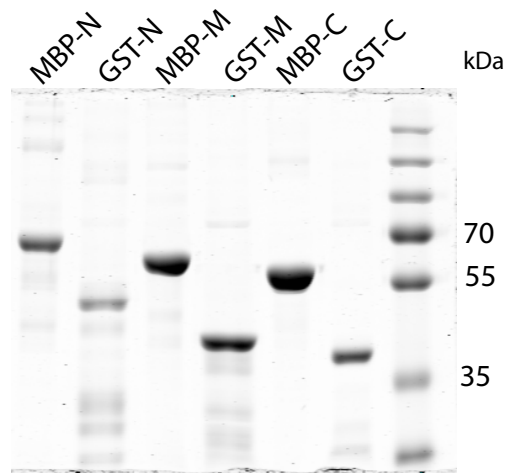

**C**

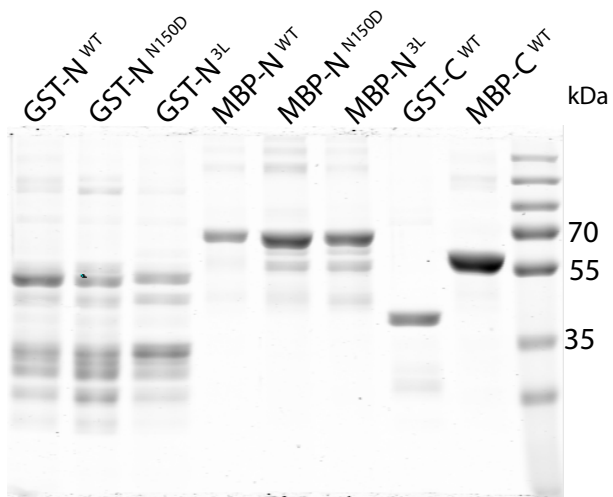

**D**

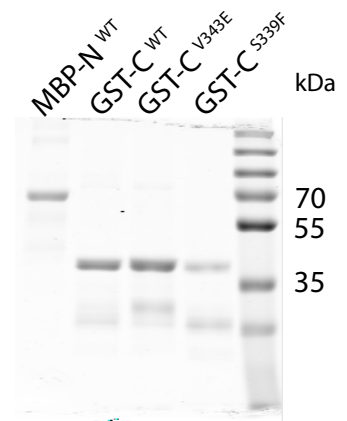

**Figure S10. Affinity purified preparations of N-terminally tagged recombinant Opi1 peptides.** (A) Opi1 polypeptide was dissected in the three indicated regions and cloned C-terminally of

MBP and GST. The indicated Opi1 chimeras were expressed in bacteria and affinity purified. Protein preparations were analyzed by SDS-PAGE and stained with Coomassie Brilliant Blue. Relevant molecular weight markers are indicated. **(B)** MBP and GST Opi1 N-, M- and C- terminal peptides. **(C, D)** MBP and GST Opi1 N- and C- terminal peptides for wild type compared to various mutants preparations.

**Table S1: Strains**

| Strain   | Relevant genotype                                                                                        | Source                        |
|----------|----------------------------------------------------------------------------------------------------------|-------------------------------|
| BY 4742  | MAT $\alpha$ <i>his3</i> $\Delta$ 1 <i>leu2</i> $\Delta$ 0 <i>lys2</i> $\Delta$ 0 <i>ura3</i> $\Delta$ 0 | Euroscarf                     |
| PMY704   | BY4742 <i>opi1</i> $\Delta$ ::HYG <i>scs2</i> $\Delta$ ::NAT <i>scs22</i> $\Delta$ ::KAN                 | This study                    |
| PMY593   | BY4741 <i>OPI1</i> -GFP:: <i>HIS3</i>                                                                    | Invitrogen                    |
| PMY1111  | BY4743 <i>OPI1</i> / <i>opi1</i> $\Delta$ ::KAN                                                          | Euroscarf                     |
| PMY1113  | BY4742 <i>opi1</i> $\Delta$ ::KAN                                                                        | This study                    |
| PMY294   | BY4742 <i>nte1</i> $\Delta$ ::NAT                                                                        | Lab collection                |
| PMY454   | BY4741 <i>ino1</i> $\Delta$ ::KAN                                                                        | Euroscarf                     |
| PMY1141  | BY4742 <i>OPI1</i> -mGFP                                                                                 | This study                    |
| PMY1145  | BY4742 <i>OPI1</i> -mGFP (L146A L153S L160A)                                                             | This study                    |
| PMY1129  | BY4742 <i>OPI1</i> -mGFP (C142Y)                                                                         | This study                    |
| PMY1133  | BY4742 <i>OPI1</i> -mGFP (L160A)                                                                         | This study                    |
| PMY1138  | BY4742 <i>OPI1</i> -mGFP (N150D)                                                                         | This study                    |
| PMY1224  | <i>ino1</i> $\Delta$ ::KAN <i>OPI1</i> -mGFP (C142Y)                                                     | This study                    |
| PMY1226  | <i>ino1</i> $\Delta$ ::KAN <i>OPI1</i> -mGFP (L160A)                                                     | This study                    |
| PMY1229  | <i>ino1</i> $\Delta$ ::KAN <i>OPI1</i> -mGFP                                                             | This study                    |
| PMY1231  | <i>ino1</i> $\Delta$ ::KAN <i>OPI1</i> -mGFP (L146A L153S L160A)                                         | This study                    |
| PMY1243  | <i>ino1</i> $\Delta$ ::KAN <i>OPI1</i> -mGFP (N150D)                                                     | This study                    |
| PMY1168  | BY4743 <i>opi1</i> $\Delta$ ::KAN / <i>opi1</i> $\Delta$ ::KAN                                           | This study                    |
| PMY1169  | BY4743 <i>opi1</i> $\Delta$ ::KAN / <i>OPI1</i> -mGFP                                                    | This study                    |
| PMY1170  | BY4743 <i>opi1</i> $\Delta$ ::KAN / <i>OPI1</i> -mGFP (L146A L153S L160A)                                | This study                    |
| PMY1171  | BY4743 <i>opi1</i> $\Delta$ ::KAN / <i>OPI1</i> -mGFP (C142Y)                                            | This study                    |
| PMY1201  | BY4743 <i>opi1</i> $\Delta$ ::KAN / <i>OPI1</i> -mGFP (L160A)                                            | This study                    |
| PMY1203  | BY4743 <i>OPI1</i> -mGFP / <i>OPI1</i> -mGFP (L160A)                                                     | This study                    |
| PMY1155  | BY4743 <i>OPI1</i> -mGFP / <i>OPI1</i> -mGFP                                                             | This study                    |
| PMY1167  | BY4743 <i>OPI1</i> -mGFP / <i>OPI1</i> -mGFP (C142Y)                                                     | This study                    |
| PMY1163  | BY4743 <i>OPI1</i> -mGFP / <i>OPI1</i> -mGFP (L146A L153S L160A)                                         | This study                    |
| PMY1159  | BY4743 <i>OPI1</i> -mGFP / <i>OPI1</i> -mGFP (N150D)                                                     | This study                    |
| PMY1177  | BY4743 <i>OPI1</i> -mGFP (N150D) / <i>OPI1</i> -mGFP (L146A L153S L160A)                                 | This study                    |
| PMY1178  | BY4743 <i>OPI1</i> -mGFP (N150D) / <i>OPI1</i> -mGFP (C142Y)                                             | This study                    |
| PMY1202  | BY4743 <i>OPI1</i> -mGFP (N150D) / <i>OPI1</i> -mGFP (L160A)                                             | This study                    |
| PMY1104  | BY4742 <i>OPI1</i> -mGFP (Y127D)::NAT                                                                    | (Hofbauer, Gecht et al. 2018) |
| MK1017   | BRS1001 <i>OPI1</i> (S339F)                                                                              | (Kadige and Lopes 2006)       |
| MK1029   | BRS1001 <i>OPI1</i> (V343E)                                                                              | (Kadige and Lopes 2006)       |
| DBY12218 | S288C <i>HAP1 met4</i> $\Delta$ ::KAN <i>OPI1</i> (K226E)                                                | (Hickman, Petti et al. 2011)  |
| DBY12219 | S288C <i>HAP1 met4</i> $\Delta$ ::NAT <i>OPI1</i> (L255S)                                                | (Hickman, Petti et al. 2011)  |

**Table S2: Primers**

| Primers                         | Sequence                                     | Description                            |
|---------------------------------|----------------------------------------------|----------------------------------------|
| 5'-U- <i>OPI1-Sall</i>          | TGTCGACACGCTTACGCAGACATCTCAT                 | Cloning 5' region of <i>OPI1</i> orf   |
| 5'-D- <i>OPI1-Xmal</i>          | TCCCGGGCATCAATGACTAGTATCTTCG                 | Cloning 5' region of <i>OPI1</i> orf   |
| 3'-U- <i>OPI1-Xmal</i>          | TCCCGGGGGACTAACCGAGACAGATT                   | Cloning 3' region of <i>OPI1</i> orf   |
| 3'-D- <i>OPI1-Sacl</i>          | TGAGCTCCTTGTTGGTAATTGGTTTC                   | Cloning 3' region of <i>OPI1</i> orf   |
| <i>Ascl</i> -3'-Up- <i>OPI1</i> | ATGGCGCGCCGAGACAGATTGAGGTCTTTC               | Cloning 3' region of <i>OPI1</i> orf   |
| 5'- <i>OPI1</i> -M              | AAAGCATATCAGGCCAGAACG                        | Cloning of <i>OPI1</i> orf             |
| 3'- <i>OPI1</i> -M              | AAGCGGGGCTGGTACAATAT                         | Cloning of <i>OPI1</i> orf             |
| F2-G                            | ATGGGAAAGTACTCATTCTC                         | Cloning 3'- <i>OPI1</i> -GFP           |
| 3'-GFP-HIS3- <i>Sacl</i>        | AGAGCTCCTGTCAAGGAGGGTATTCTG                  | Cloning 3'- <i>OPI1</i> -GFP           |
| mGFP-A206Kf                     | CATTACCTGTCCACACAATCTAAACTTTCGAAAGATCCCAACG  | Mutagenesis                            |
| mGFP-A206Kr                     | CGTTGGGATCTTTCGAAAGTTTATAGTTGTGTGGACAGGTAATG | Mutagenesis                            |
| 5'-H144L                        | TTGTAACGTGCTTGCTTCTTTTAAAGCTGG               | Mutagenesis                            |
| 3'-H144L                        | CCAGCTTTAAAGAAGCAAGCACGTTACAA                | Mutagenesis                            |
| 5'-N150D                        | CTTTTAAAGCTGGCCGATAAGCAGCTTTCGATAA           | Mutagenesis                            |
| 3'-N150D                        | TTATCGGAAAGCTGCTTATCGGCCAGCTTTAAAG           | Mutagenesis                            |
| 5'-N150I                        | CTTTTAAAGCTGGCCATTAAGCAGCTTTCGATAA           | Mutagenesis                            |
| 3'-N150I                        | TTATCGGAAAGCTGCTTAAATGGCCAGCTTTAAAG          | Mutagenesis                            |
| 5'-N150E                        | CTTTTAAAGCTGGCCAAAAGCAGCTTTCGATAA            | Mutagenesis                            |
| 3'-N150E                        | TTATCGGAAAGCTGCTTTTCGGCCAGCTTTAAAG           | Mutagenesis                            |
| 5'-N150K                        | CTTTTAAAGCTGGCCAAAAGCAGCTTTCGATAA            | Mutagenesis                            |
| 3'-N150K                        | TTATCGGAAAGCTGCTTTTTGGCCAGCTTTAAAG           | Mutagenesis                            |
| 5'-N150R                        | CTTTTAAAGCTGGCCAGAAAGCAGCTTTCGATAA           | Mutagenesis                            |
| 3'-N150R                        | TTATCGGAAAGCTGCTTCTGGCCAGCTTTAAAG            | Mutagenesis                            |
| 5'-L146A                        | GTAACGTGCTTGATCTTGCAAAGCTGGCCAATAAGC         | Mutagenesis                            |
| 5'-L146A                        | GCTTATTGGCCAGCTTTGCAAGATGCAAGCACGTTAC        | Mutagenesis                            |
| 5'-L153S                        | GCTGGCCAATAAGCAGTCTCCGATAAAATCTCG            | Mutagenesis                            |
| 3'-L153S                        | CGAGATTTTATCGGAAGACTGCTTATTGGCCAGC           | Mutagenesis                            |
| 5'-N- <i>EcoRI</i>              | ATGAATTCATGTCTGAAAATCAACGTTTAG               | Cloning N-Opi1 (pMAL and pGEX vectors) |
| 3'-N- <i>NotI</i>               | ATGCGGCCGCTGTCTCGTCTCGCCAGC                  | Cloning N-Opi1 (pGEX vector)           |
| 3'-N- <i>Sall</i>               | ATGTCGACTTATGTCTCGTCTCGCCAGC                 | Cloning N-Opi1 (pMAL vector)           |
| 5'-M- <i>EcoRI</i>              | ATGAATTCTCGTCAGACGAAGACGAC                   | Cloning M-Opi1 (pMAL and pGEX vectors) |
| 3'-M- <i>NotI</i>               | ATGCGGCCGCTTGCTGTTGCTGTTGCTC                 | Cloning M-Opi1 (pGEX vector)           |
| 3'-M- <i>Sall</i>               | ATGTCGACTTATTGCTGTTGCTGTTGCTC                | Cloning M-Opi1 (pMAL vector)           |
| 5'-C- <i>EcoRI</i>              | ATGAATTCAGCAACAGCAGCAGCAG                    | Cloning C-Opi1 (pMAL and pGEX vectors) |
| 3'-C- <i>NotI</i>               | ATGCGGCCGCTGCTTGTATCCAGGTTG                  | Cloning C-Opi1 (pGEX vector)           |
| 3'-C- <i>XbaI</i>               | ATTCTAGATTAGTCTTGCTATCCAGGTTG                | Cloning C-Opi1 (pMAL vector)           |
| 5'- <i>OPI1g</i>                | CTCACAGTACAACAGCGACG                         | Genotyping                             |
| 3'- <i>OPI1g</i>                | TACAGTTCTCCCGTGGTCAC                         | Genotyping                             |

**Table S3: Plasmids**

| Plasmid                                    | Description                                                                                                                                                              | Source                                  |
|--------------------------------------------|--------------------------------------------------------------------------------------------------------------------------------------------------------------------------|-----------------------------------------|
| pPM169                                     | pRS415- <i>OPI1</i>                                                                                                                                                      | This study                              |
| pPM170                                     | pRS415-5'/3' flanking <i>OPI1</i> ORF sequences                                                                                                                          | This study                              |
| pRS416- <i>NTE1</i><br>pRS415- <i>NTE1</i> | <i>NTE1</i> gene under its own promoter on a pRS416 or pRS415 vector                                                                                                     | (Fernandez-Murray, Gaspard et al. 2009) |
| pPSB2F                                     | pRS415- <i>OPI1</i> (L143S)                                                                                                                                              | This study                              |
| pPM24                                      | pRS415- <i>OPI1</i> (H144L)                                                                                                                                              | This study                              |
| pPSB27                                     | pRS415- <i>OPI1</i> (H144Y)                                                                                                                                              | This study                              |
| pPSB2J                                     | pRS415- <i>OPI1</i> (K147E)                                                                                                                                              | This study                              |
| pPM33                                      | pRS415- <i>OPI1</i> (N150D)                                                                                                                                              | This study                              |
| pPM245                                     | pRS415- <i>OPI1</i> (N150E)                                                                                                                                              | This study                              |
| pPM246                                     | pRS415- <i>OPI1</i> (N150I)                                                                                                                                              | This study                              |
| pPM247                                     | pRS415- <i>OPI1</i> (N150K)                                                                                                                                              | This study                              |
| pPM248                                     | pRS415- <i>OPI1</i> (N150R)                                                                                                                                              | This study                              |
| pPM449                                     | pRS415- <i>OPI1</i> (K226E)                                                                                                                                              | This study                              |
| pPM450                                     | pRS415- <i>OPI1</i> (N150D K226E)                                                                                                                                        | This study                              |
| pPM452                                     | pRS415- <i>OPI1</i> (L252F)                                                                                                                                              | This study                              |
| pPM451                                     | pRS415- <i>OPI1</i> (N150D L252F)                                                                                                                                        | This study                              |
| pPM455                                     | pRS415- <i>OPI1</i> (L255S)                                                                                                                                              | This study                              |
| pPM454                                     | pRS415- <i>OPI1</i> (N150D L255S)                                                                                                                                        | This study                              |
| pPM390                                     | pRS415- <i>OPI1</i> (S339F)                                                                                                                                              | This study                              |
| pPM399                                     | pRS415- <i>OPI1</i> (N150D S339F)                                                                                                                                        | This study                              |
| pPM391                                     | pRS415- <i>OPI1</i> (V343E)                                                                                                                                              | This study                              |
| pPM384                                     | pRS415- <i>OPI1</i> (N150D V343E)                                                                                                                                        | This study                              |
| pPM62                                      | pRS416- <i>OPI1</i> (N150D)                                                                                                                                              | This study                              |
| pPM108                                     | pRS415- <i>OPI1</i> (L153S L160A)                                                                                                                                        | This study                              |
| pPM112                                     | pRS415- <i>OPI1</i> (L146A L153S L160A)                                                                                                                                  | This study                              |
| pPM494                                     | pRS415- <i>OPI1</i> -mGFP; orf flanked by upstream and downstream regions of <i>OPI1</i> locus, for healing a double strand DNA break introduced at <i>opi1Δ::kanMX4</i> | This study                              |
| pPM500                                     | pRS415- <i>OPI1</i> -mGFP (L160A), analogous to pPM494                                                                                                                   | This study                              |
| pPM501                                     | pRS415- <i>OPI1</i> -mGFP (N150D), analogous to pPM494                                                                                                                   | This study                              |
| pPM502                                     | pRS415- <i>OPI1</i> -mGFP (L146A L153S L160A), analogous to pPM494                                                                                                       | This study                              |
| pPM503                                     | pRS415- <i>OPI1</i> -mGFP (C142Y), analogous to pPM494                                                                                                                   | This study                              |
| pPM293                                     | pGEX-N- <i>OPI1</i>                                                                                                                                                      | This study                              |
| pPM297                                     | pMAL-N- <i>OPI1</i>                                                                                                                                                      | This study                              |
| pPM305                                     | pGEX-M- <i>OPI1</i>                                                                                                                                                      | This study                              |
| pPM313                                     | pMAL-M- <i>OPI1</i>                                                                                                                                                      | This study                              |
| pPM307                                     | pGEX-C- <i>OPI1</i>                                                                                                                                                      | This study                              |
| pPM307                                     | pMAL-C- <i>OPI1</i>                                                                                                                                                      | This study                              |
| pPM321                                     | pGEX-N- <i>OPI1</i> (N150D)                                                                                                                                              | This study                              |
| pPM323                                     | pMAL-N- <i>OPI1</i> (N150D)                                                                                                                                              | This study                              |
| pPM322                                     | pGEX-N- <i>OPI1</i> (L146A L153S L160A)                                                                                                                                  | This study                              |
| pPM324                                     | pMAL-N- <i>OPI1</i> L146A L153S L160A)                                                                                                                                   | This study                              |
| pPM341                                     | pGEX-C- <i>OPI1</i> (V343E)                                                                                                                                              | This study                              |
| pPM307                                     | pGEX-C- <i>OPI1</i> (S339F)                                                                                                                                              | This study                              |
| pCW4                                       | ARS CEN <i>LEU2 OPI1</i> (L160A)                                                                                                                                         | (Wagner, Blank et al. 1999)             |
| pPM41                                      | pRS200- <i>OPI1</i> (C142Y)                                                                                                                                              | (Kaadige and Lopes 2006)                |
| pPM42                                      | pRS200- <i>OPI1</i> (L252F)                                                                                                                                              | (Kaadige and Lopes 2006)                |
| pPM551                                     | p2UG-2XORE-Luc; firefly luciferase gene under the promoter of <i>FOX3</i> gene                                                                                           | (Phelps, Gburcik et al. 2006)           |
| pAR1275                                    | pRS425 carrying Cas9 and a guide RNA targeting KAN gene marker                                                                                                           | Dr. Adam Rudner                         |

Table S4: LC mobile phase composition and gradient

| Time (min) | Flow rate (ml/min) | Line A<br>Acetonitrile<br>% | Line B<br>Isopropanol<br>% | Line C<br>Water<br>% | Line D<br>0.1% formic acid +<br>0.4 M ammonium formate<br>% |
|------------|--------------------|-----------------------------|----------------------------|----------------------|-------------------------------------------------------------|
| 0          | 0.2                | 43.6                        | 26.3                       | 27.6                 | 2.5                                                         |
| 3          | 0.2                | 43.6                        | 26.3                       | 27.6                 | 2.5                                                         |
| 8          | 0.2                | 37.1                        | 37.7                       | 22.6                 | 2.5                                                         |
| 9          | 0.2                | 33.6                        | 43.9                       | 20.0                 | 2.5                                                         |
| 18         | 0.2                | 13.7                        | 79.0                       | 4.8                  | 2.5                                                         |
| 26         | 0.2                | 9.3                         | 86.9                       | 1.4                  | 2.5                                                         |
| 30         | 0.2                | 9.3                         | 86.9                       | 1.4                  | 2.5                                                         |
| 35         | 0.2                | 43.6                        | 26.3                       | 27.6                 | 2.5                                                         |
| 45         | 0                  |                             |                            |                      |                                                             |

Table S5: Q Exactive acquisition parameter

|                                         | Positive ion mode | Negative ion mode |
|-----------------------------------------|-------------------|-------------------|
| <b>Tune settings</b>                    |                   |                   |
| Spray voltage                           | 3400 (+)          | 3200 (-)          |
| Capillary temperature                   | 300               | 300               |
| Sheath gas                              | 40                | 40                |
| Aux gas                                 | 2                 | 2                 |
| Spare gas                               | 0                 | 0                 |
| Probe heater temp                       | 350               | 350               |
| S-lens RF level                         | 50                | 50                |
| Ion source                              | HESI              | HESI              |
| <b>Global setting</b>                   |                   |                   |
| Use lock masses                         | Best              | Best              |
| Chrom. Peak width (FWHM)                | 15 s              | 15 s              |
| Method duration                         | 45 min            | 45 min            |
| <b>Experiment</b>                       |                   |                   |
| <i>Full MS/dd-MS<sup>2</sup> (TOPN)</i> |                   |                   |
| Runtime                                 | 0 to 45 min       | 0 to 45 min       |
| Polarity                                | Positive          | Negative          |
| Microscans                              | 1                 | 1                 |
| Resolution                              | 70,000            | 70,000            |
| AGC target                              | 1e6               | 1e6               |
| Maximum IT                              | 246 ms            | 246 ms            |
| Number of scan ranges                   | 1                 | 1                 |
| Scan range                              | 300 to 1700 m/z   | 300 to 1700 m/z   |
| Spectrum data type                      | Profile           | Profile           |
| <i>dd-MS<sup>2</sup></i>                |                   |                   |
| Microscans                              | 1                 | 1                 |
| Resolution                              | 17,500            | 17,500            |
| AGC target                              | 5e5               | 5e5               |
| Maximum IT                              | 150 ms            | 150 ms            |
| Loop count                              | 15                | 15                |
| Top N                                   | 15                | 15                |
| Isolation window                        | 1 m/z             | 1 m/z             |
| Scan range                              | 200 to 2000 m/z   | 200 to 2000 m/z   |
| (N)CE / stepped (N)CE                   | nce: 25, 35       | nce: 25, 35       |



|                     |             |             |
|---------------------|-------------|-------------|
| Spectrum data type  | Profile     | Profile     |
| <i>dd settings</i>  |             |             |
| Minimum AGC target  | 1e4         | 5e3         |
| Intensity threshold | 6.7e4       | 3.3e4       |
| Peptide match       | Off         | Off         |
| Exclude isotopes    | On          | On          |
| Dynamic exclusion   | 8 s         | 8 s         |
| If idle             | Pick others | Pick others |

Table S6: Lipid identification and quantitation parameters

|                                 |                      |
|---------------------------------|----------------------|
| Database name                   | General-lcms-product |
| Search type                     | Product (LC-MS)      |
| Precursor tol                   | 5                    |
| Precursor tol type              | ppm                  |
| Product tol                     | 8                    |
| Product tol type                | ppm                  |
| Product threshold               | 1                    |
| Product threshold type          | relative             |
| Group                           | disable              |
| Merge type                      | Mean                 |
| Filter type                     | Setting filter       |
| Merge Rt tolerance              | 0.05                 |
| Merge Rt Crr tolerance          | 0.5                  |
| Merge Sn threshold              | 3                    |
| Merge lty ratio threshold       | 1.5                  |
| Merge valid Cnt ratio threshold | 0.5                  |
